# Supplementary material
Source: HighWire-hosted journal article supplement (http://heart.bmjjournals.com/highwire/filestream/125070/field_highwire_adjunct_files/0/934432webonlyappendix.pdf)
Supplement: 934432webonlyappendix.pdf [file 934432webonlyappendix.pdf]

## APPENDIX

### Table 1 in the Review: How the numbers were estimated

**MPS** : calculated wte people assuming 40 **MPS** studies per week (8 per day) over 48 weeks giving  $\pm 2000$  per year. Thus 2000 MPSs per million in a population of 60 million leads to 120,000 studies and hence 60 cardiologists and 180 technician. (Estimated on 3 techs per 1 cardiologist per 2000 studies. Calculations will depend on mix medical and non-medical staff)

**Stress Echocardiography** : calculated wte people assuming 25 **stress echos** per week (5 per day) over 48 weeks giving 1200 per year. This means that 4000 stress echos per million in a population of 60 million leads to 240,000 studies and hence 200 cardiologists and technicians.

**CMR** : Current utilisation of and staff (full time employed in CMR) in the UK is estimated from known activity at the major centres. New indications in CAD and increasing roll-out of CMR are estimated to double usage by 2010 and increase activity 10 fold by 2020.

**CT** : Calculated from 20 ct scans per day / 100 per week / 5000 per year. For a population of 60 million this means an additional 120,000 scans per year.

**Figure A1: Algorithm of current status for investigating CAD**

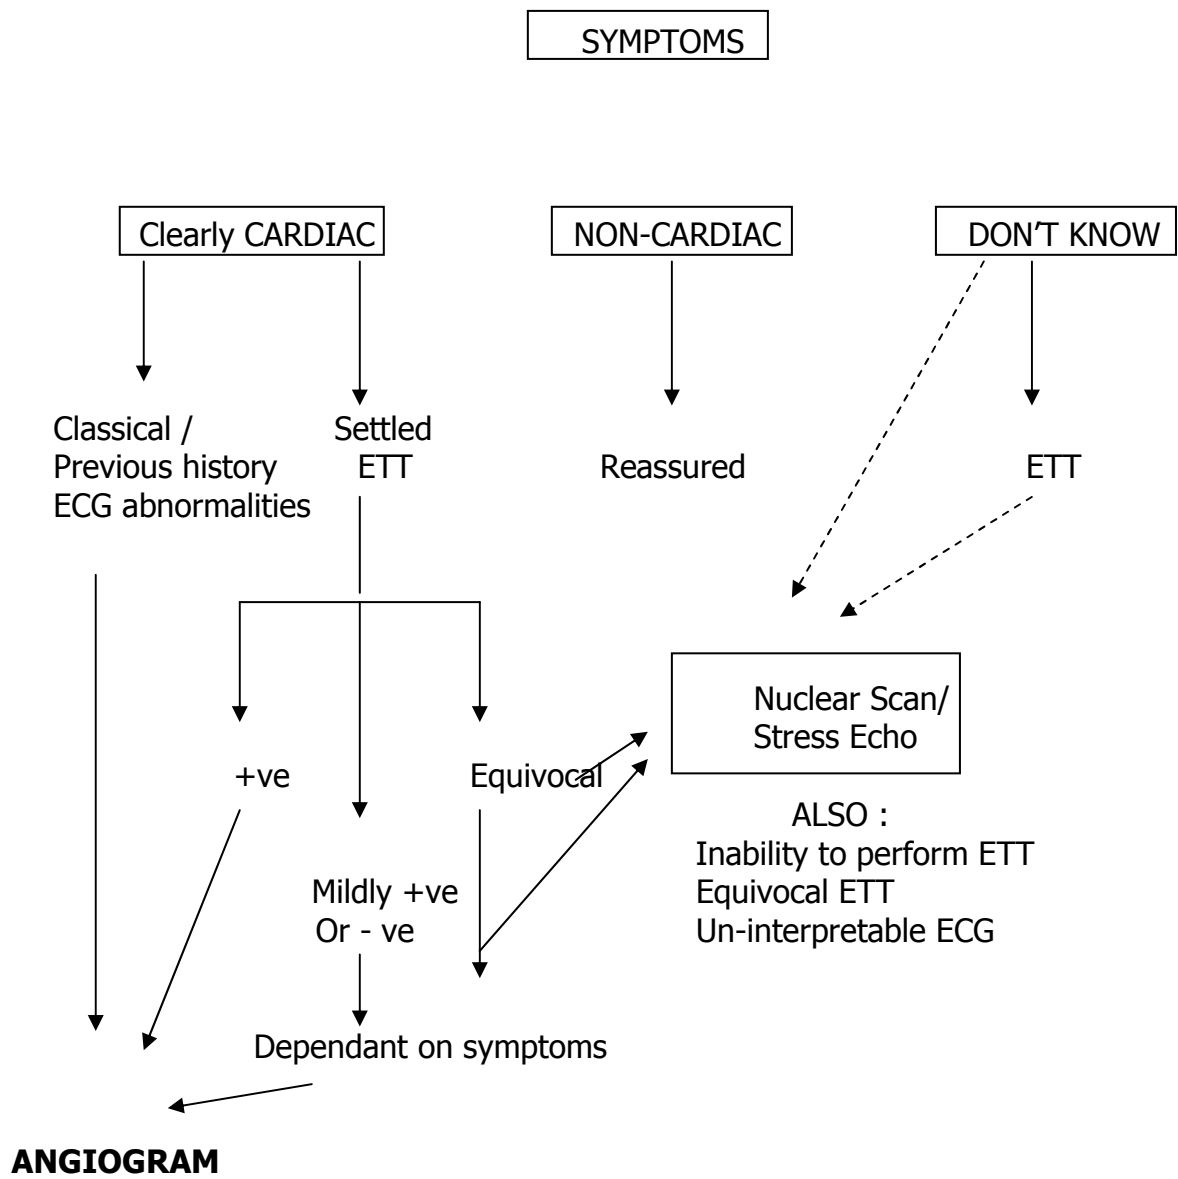

**Table A1: Qualitative evaluation of current and potential future tests for the evaluation of patients with coronary artery disease**

|                                         | Nuclear Scans                                                                          | Stress Echo                                                                                                | CMR                                                                                                                   | MDCT                                                                                                                            | Coronary and LV Angiogram                                                                                                                                                                        |
|-----------------------------------------|----------------------------------------------------------------------------------------|------------------------------------------------------------------------------------------------------------|-----------------------------------------------------------------------------------------------------------------------|---------------------------------------------------------------------------------------------------------------------------------|--------------------------------------------------------------------------------------------------------------------------------------------------------------------------------------------------|
| LV Structure                            | +                                                                                      | ++                                                                                                         | +++                                                                                                                   | ++                                                                                                                              | ++<br>2 dimensions only                                                                                                                                                                          |
| LV Function<br>- at rest<br>- on stress | +++<br>++                                                                              | +++<br>++                                                                                                  | +++<br>+++<br>scar/infarct size                                                                                       | +<br>–                                                                                                                          | ++<br>–                                                                                                                                                                                          |
| Coronary Anatomy                        | –                                                                                      | –                                                                                                          | +                                                                                                                     | ++                                                                                                                              | +++                                                                                                                                                                                              |
| Advantages                              | Established.<br>Prognostic information.<br><br>Costs -<br>Equipment ++<br>Procedure ++ | No radiation.<br>Ease of procedure.<br>Prognostic Information<br><br>Costs -<br>Equipment +<br>Procedure + | No radiation.<br>LV structure and function in one test.<br><br>Costs -<br>Equipment +++<br>Procedure ++               | Rapid procedure time.<br>Coronary resolution good.<br>Wall structure assessment.<br><br>Costs –<br>Equipment ++<br>Procedure ++ | “Gold standard”.<br>Prospective longitudinal studies giving prognostic info.<br>Quick.<br>Widely used.<br>Training programme already established.<br><br>Costs -<br>Equipment ++<br>Procedure ++ |
| Disadvantages                           | Radiation.<br>Staffing.<br>No coronary anatomy.<br>Rivalry with Stress Echo.           | Reporting. Operator dependant.<br>No coronary anatomy.<br>Rivalry with MPS.                                | Training to be established.<br>Patient discomfort.<br>Analysis time.<br>Some devices incompatible with CMR currently. | Radiation.<br>Need careful patient preparation (beta blockers/ nitrates).<br>No added information ?<br>Calcification.           | Radiation<br>Invasive<br>Luminogram                                                                                                                                                              |
| Future developments likely              | –                                                                                      | Automated edge detection.<br>3D<br>Myocardial contrast imaging                                             | New sequences.<br>Navigator systems.<br>MR compatible pacemakers.<br>Interventional procedures possible               |                                                                                                                                 | –                                                                                                                                                                                                |
